# Supplementary material for: Epoxidation of alkenes with hydrogen peroxide catalyzed by iron(iii) porphyrins in ionic liquidsElectronic supplementary information (ESI) available: experimental. See http://www.rsc.org/suppdata/cc/b2/b207072n/
Source: Royal Society of Chemistry journal article supplement (doi:10.1039/b207072n), 2002-09-24
Supplement: b207072n.doc [file b207072n.doc]

Epoxidation of alkenes with hydrogen peroxide catalyzed by iron(III) porphyrins in ionic liquids

K.A. Srinivas, Anil Kumar and S.M.S. Chauhan*

*Department of Chemistry, University of Delhi, Delhi 110 007, India*

*Email: smschauhan@chemistry.du.ac.in*

**General**: Electronic spectra were recorded on Shimadzu UV 260 and Varian Cary 100 spectrophotometer. IR spectra were recorded on a Perkin Elmer 1710 FTIR spectrophotometer and the max is expressed in cm-1. 1H NMR spectra were recorded on a Bruker 300 MHz spectrophotometer and Perkin Elmer 60 MHz. GC analysis was performed on Shimazdu GC-14B using packed column SE-30. Pyrrole and 2,6-dichlorobenzaldehyde, Cyclohexene and cyclooctene were obtained from Acros, USA. Styrene and *p*-chlorostyrene, 1-methylimidazole were obtained from Fluka Chemicals, Switzerland. N-Butyl bromide and Hydrogen peroxide (30%, v/v) were obtained from SD Fine Chemicals, India.

**Synthesis of 5,10,15,20-tetra-(2,6-dichloro-3-sulfonatophenyl)porphyrinato iron(III) [Cl8TPPS4Fe(III)]**

H2Cl8TPP (1.68 g, 1.89 mmol) was placed in a 50 ml 3-necked round bottom flask fitted with reflux condenser surmounted by a drying tube and treated with oleum (18-24% free SO3, 20 ml). The dark green reaction mixture was stirred and heated to 165 oC (at this temperature the oleum was refluxing) for 7 h then allowed to stir overnight at room temperature. The reaction mixture was poured carefully into crushed ice (200 g) and adjusted to pH = 7 with a saturated NaOH solution (40 ml). Ethanol (500 ml) was added and NaSO4 formed was separated by filtration and the filtrate was concentrated to 100 ml, EtOH (300 ml) was added and the mixture was stored overnight in the fridge. The precipitate formed was removed by filtration, rinsed with EtOH, and the volume reduced to 50 ml. This was evaporated to dryness, affording 3.8 g of 5,10,15,20-tetrakis(2,6-dichloro-3-sulphonatophenyl) porphyrin salt (H2Cl8TPPS4). The solid was redissolved in water, passed through an ion exchange resin column (Amberlite MB3) and lyophilized

UV-vis (Water) max nm (103, M-1cm-1): 418 (91.5), 518 (24.0), 549 (12.0), 602 (3.0), 647 (1.5).

1H NMR (300 MHz, D2O)  ppm: 8.54 (d, 4H, J = 8.7 Hz, aromatic protons), 8.71 (d, 4H, J = 8.7 Hz, aromatic protons), 8.98 (s, 8H, pyrrolic protons).

Iron insertion into the tetrasodium salt of H2Cl8TPPS4 was achieved using FeCl2.4H2O/DMF procedure. H2Cl8TPPS4 (3.5 g, 1.89 mmol) and FeCl2.4H2O (2.26 g 0.114 mmol) and DMF (500 ml) were degassed and refluxed under argon (to prevent the oxidation of Fe2+ to Fe3+ before insertion). The progress of the reaction was monitored by UV-visible spectroscopy in DMF (the Soret shifted from 418 to 417 nm while in the visible region the spectrum changed 512, 549, 602, 647, to 576, 660). The metal insertion was complete with in 3 h. Heating was discontinued and the solution was stirred in air (the color turned from green to brown within 5 min), and allowed to cool down before evaporating to dryness. The residue was dissolved in water (100 ml) and the solution was passed through an ion exchange resin column (Amberlite IR-120 (H), 100 g) to remove the excess of iron salt. After evaporation of water, the residue was dissolved in methanol (200 ml) and filtered, the volume was reduced to 80 ml and 230 ml of benzene was added. The solution was lyophilized to yield 2.78 g of Cl8TPPS4Fe(III)

UV-vis (Water) max nm (103, M-1cm-1) 399 (87.0), 528 (27.0), 630 (4.5).

**Synthesis of 1-butyl-3-methylimidazolium bromide [bmim][Br] ionic liquid**

In a 100 ml round-bottom flask, 1-Methylimidazole (24.63 g, 0.3 mol, dried over MgSO4) was mixed with *n*-butyl bromide (58.65 g, 0.45 mol) and allowed to reflux for 24 h at 70 oC. The excess butyl bromide was distilled off and the residue was extracted thoroughly 2-3 times (100 ml each) with diethyl ether to remove the unreacted starting materials. A clear yellow viscous oily liquid of 1-butyl-3-methylimidazolium bromide was obtained in 94% yield (61.76 g). Further, the formation of ionic liquid [bmim][Br] confirmed from the various spectroscopic data.

IR (Thin film, cm-1): 3422, 3093, 3149, 2962, 2937, 2875, 2065, 1633, 1573, 1383, 1467, 1429, 1337, 1169, 1282, 1114, 1022, 842, 754, 622.

1H NMR (60 MHz, D2O)  ppm: 0.72 (t, 3H, CH3), 1.15 (m, 2H, CH2), 1.81 (m, 2H, CH2), 3.71 (s, 3H, N-CH3), 4.09 (t, 2H, N-CH2), 7.38 (s, 1H, NCH), 7.43 (s, 1H, NCH), 8.7 (s, 1H, N(H)CN)

**Immobilization of Cl8TPPS4Fe(III) in ionic liquids**

To a solution of ionic liquid (2 mL), Cl8TPPS4Fe(III) (1 mmole, 1.285mg) and stirred at room temperature for 10 minutes to dissolve Cl8TPPS4Fe(III) completely in ionic liquid [bmim][Br]. The catalyst anionic water-soluble iron(III) porphyrin Cl8TPPS4Fe(III) is freely soluble in the ionic liquids [bmim][Br] since they are ionic in nature. An aliquot of 20 l was drawn and injected into 3 ml of water in an UV-cell. The solution was thoroughly shaken and the UV-visible spectrum of transparent solution was recorded. The UV-visible spectrum of iron(III) porphyrin in ionic liquid is having a Soret at 399nm and Q-bands at 528 and 630 nm, which is similar to the UV-visible spectrum of iron(III) porphyrin in aqueous solution (Fig 1). However, broadening of the Soret band and a concomitant increase in molar absorptivity at max (Soret) has been observed in case of porphyrin in ionic liquid, indicates the formation of ion-pair complexes. Further, the addition of hydrogen peroxide to porphyrin in ionic liquid decreases the absorption of Soret band indicating the formation of iron-*oxo* intermediate similar to that formed in the aqueous solution. This indicates that the immobilized iron(III) porphyrin porphyrin in ionic liquid behaves like catalyst in the aqueous solution (Fig 1). In other words, the ionic liquid is providing the reaction media with stabilization of iron(III) porphyrins by ionic interactions.


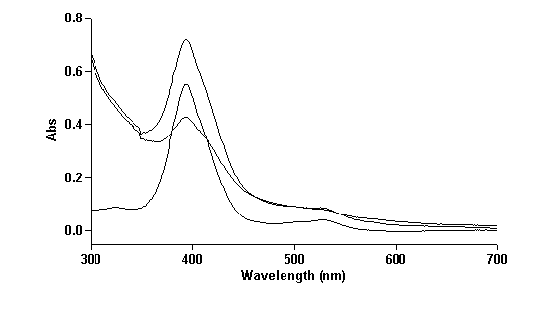


A

B

C

**Figure S1** UV-visible spectrum of A) Cl8TPPS4Fe(III) B) Cl8TPPS4Fe(III) + [bmim][Br] C)

Cl8TPPS4Fe(III) + [bmim][Br] + H2O2

**Epoxidation of alkenes with hydrogen peroxide catalyzed by Cl8TPPS4Fe(III) in ionic liquids**

The catalyst Cl8TPPS4Fe(III)(1.25 mmol) was dissolved in ionic liquid [bmim][Br] (2 cm3). To this solution, alkene (125 mmol) in dichloromethane (5 cm3) was added under nitrogen atmosphere. The two-phase system was stirred at room temperature for 4-5 h. Progress of the reaction was monitored by GC. The organic phase was separated, washed with water and dried with anhydrous Na2SO4. The solvents removed under reduced pressure and the residue was chromatographed on silica gel. The formation of different products has been confirmed by comparison of GC retention times and NMR data.

**Styrene epoxide**: GC retention time is 13.5 min (Styrene is 6.8 min)

1H NMR (60 MHz, CDCl3,  ppm): 3.50 (dd, 1H, CH2), 3.59 (dd, 1H, Ar-CH), 7.29 (m, 5H, Ar).

**Phenylacetaldehyde**: GC retention time is 13.82 min,

1H NMR (60 MHz, CDCl3,  ppm): 2.84 (s, 2H, CH2), 7.35 (m, 5H, Ar), 9.90 (s, 1H, CHO).

***p*-Cl-Styrene epoxide**: GC retention time is 14.12 min (*p*-Cl-Styrene is 12.14 min)

1H NMR (60 MHz, CDCl3,  ppm): 3.60 (dd, 1H, CH2), 3.95 (dd, 1H, Ar-CH), 7.31 (d, 2H, Ar), 7.40 (d, 2H, Ar).

***p*-Cl-Phenyacetaldehyde**: GC retention time is 14.94 min

1H NMR (60 MHz, CDCl3,  ppm): 3.01 (s, 2H, CH2), 7.42 (d, 2H, Ar), 7.64 (d, 2H, Ar), 10.08 (s, 1H, CHO).

**Cyclohexene epoxide**: GC retention time is 5.2 min (Cyclohexene is 2.1 min)

1H NMR (60 MHz, CDCl3,  ppm): 1.51 (m, 4H, CH2), 1.85 (m, 4H, CH2), 3.42 (m, 2H, CH-O-CH),.

**Cyclohexenol**: GC retention time is 7.4 min

1H NMR (60 MHz, CDCl3,  ppm): 1.62 (m, 2H, CH2), 2.15 (m, 4H, CH2), 4.40 (t, 1H, CHOH), 4.60 (brs, 1H, -OH), 5.64 (t, 1H, C=CH-C(OH)), 5.72 (m, 1H, CH=C-C(OH)).

**Cyclohexenone**: GC retention time is 7.8 min

1H NMR (60 MHz, CDCl3,  ppm): 2.05 (m, 2H, CH2), 2.25 (t, 2H, CH2-CO), 2.51 (m, 2H, CH2-C=), 6.10 (d, 1H, C=CH-CO), 7.35 (m, 1H, CH=C-CO).

**Cyclooctene epoxide**: GC retention time is 20.9 min (Cyclooctene is 6.0 min)

1H NMR (60 MHz, CDCl3,  ppm): 1.58 (m, 8H, CH2), 1.89 (m, 4H, CH2-CHOCH), 3.39 (m, 2H, CH-O-CH).
